## CORRECTION

# Correction: A Geospatial Comparison of Distributed Solar Heat and Power in Europe and the US

Zack Norwood, Emil Nyholm, Todd Otanicar, Filip Johnsson

## Notice of Republication

An incorrect file was mistakenly included in File S1. This article was republished on February 2, 2022, to correct for this error. Please download this article again to view the correct version.

## Reference

1. Norwood Z, Nyholm E, Otanicar T, Johnsson F (2014) A Geospatial Comparison of Distributed Solar Heat and Power in Europe and the US. PLoS ONE 9(12): e112442. <https://doi.org/10.1371/journal.pone.0112442> PMID: 25474632

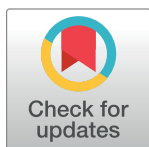

## OPEN ACCESS

**Citation:** Norwood Z, Nyholm E, Otanicar T, Johnsson F (2022) Correction: A Geospatial Comparison of Distributed Solar Heat and Power in Europe and the US. PLoS ONE 17(2): e0264088. <https://doi.org/10.1371/journal.pone.0264088>

**Published:** February 10, 2022

**Copyright:** © 2022 Norwood et al. This is an open access article distributed under the terms of the [Creative Commons Attribution License](https://creativecommons.org/licenses/by/4.0/), which permits unrestricted use, distribution, and reproduction in any medium, provided the original author and source are credited.
